# Supplementary material
Source: PubMed Central journal article supplement (PMC5244305)
Supplement: AEM.02499-16_zam999117636s1.pdf [file AEM.02499-16_zam999117636s1.pdf]

**Table S1** Details of *Treponema* strains included in the multilocus genetic analysis

| Strain                                       | Isolation site or oral condition, depositor or source of the strain used in this study                 | Geographical location of host subject | Reference           |
|----------------------------------------------|--------------------------------------------------------------------------------------------------------|---------------------------------------|---------------------|
| <b>'T. vincentii' (n=11)</b>                 |                                                                                                        |                                       |                     |
| ATCC 35580, OMZ 293, LA-1                    | Subgingival plaque from periodontitis diseased site (from ATCC and via C. Wyss, University of Zurich)  | USA                                   | Mangan 1982 (1)     |
| ATCC 700013 (OMZ 779, N9, F0403)             | Subgingival plaque, R. Smibert (C. Wyss, University of Zurich)                                         | USA                                   | Paster 1998 (2)     |
| ATCC 700765 (OMZ 800, DSM 16788)             | Patient with periodontitis, C. Wyss, University of Zurich                                              | Switzerland                           | Wyss 1998 (3)       |
| ATCC 700774 (OMZ 860)                        | Human ANUG lesion, C. Wyss, University of Zurich                                                       | China                                 | Correia 2003 (4)    |
| OMZ 801                                      | Patient with periodontitis, C. Wyss, University of Zurich                                              | Switzerland                           | Wyss 1998 (3)       |
| OMZ 802                                      | Patient with periodontitis, by Wyss, University of Zurich                                              | Switzerland                           | Wyss 1998 (3)       |
| OMZ 858                                      | Human ANUG lesion, C. Wyss (via G. Belibasakis, University of Zurich)                                  | China                                 | Correia 2003 (4)    |
| OMZ 859                                      | Human ANUG lesion, C. Wyss, University of Zurich                                                       | China                                 | -                   |
| OMZ 861                                      | Human ANUG lesion, C. Wyss (via G. Belibasakis, University of Zurich)                                  | China                                 | Correia 2003 (4)    |
| OMZ 862                                      | Human ANUG lesion, C. Wyss (via G. Belibasakis, University of Zurich)                                  | China                                 | Correia 2003 (4)    |
| OMZ 863                                      | Human ANUG lesion, C. Wyss, University of Zurich                                                       | China                                 | -                   |
| <b>T. medium (n=1)</b>                       |                                                                                                        |                                       |                     |
| ATCC 700293 <sup>T</sup> (ex G7021, OMZ 824) | Subgingival plaque of patient with adult periodontitis, T. Umemoto (via C. Wyss, University of Zurich) | Japan                                 | Umemoto 1997 (5)    |
| <b>'T. sinensis' (T. sp. IA) (n=4)</b>       |                                                                                                        |                                       |                     |
| ATCC 700772 (OMZ 838, DSM 16789)             | Necrotizing ulcerative gingivitis lesion, C. Wyss, University of Zurich                                | China                                 | Chan 2014 (6)       |
| OMZ 855                                      | Chinese gingivitis patient, C. Wyss, University of Zurich                                              | China                                 | -                   |
| OMZ 856                                      | Chinese gingivitis patient, C. Wyss, University of Zurich                                              | China                                 | -                   |
| OMZ 857                                      | Necrotizing ulcerative gingivitis lesion, C. Wyss, University of Zurich                                | China                                 | -                   |
| <b>T. sp. IB (n=3)</b>                       |                                                                                                        |                                       |                     |
| OMZ 305 ('T. vincentii' Ritz A)              | Human oral, B. Laughon, via C. Wyss, University of Zurich                                              | USA                                   | Reijntjens 1986 (7) |
| OMZ 805                                      | Patient with periodontitis, C. Wyss, University of Zurich                                              | Switzerland                           | Wyss 1998 (3)       |
| ATCC 700767 (OMZ 806, DSM 16787)             | Patient with periodontitis, ATCC, and C. Wyss, University of Zurich                                    | Switzerland                           | Wyss 1998 (3)       |
| <b>T. sp. IC (n=4)</b>                       |                                                                                                        |                                       |                     |

|                                                        |                                                                                                                                                     |             |                      |
|--------------------------------------------------------|-----------------------------------------------------------------------------------------------------------------------------------------------------|-------------|----------------------|
| ATCC 700766 (OMZ 804, MH1F1)                           | Patient with periodontitis, C. Wyss, University of Zurich                                                                                           | Switzerland | Wyss 1998 (3)        |
| OMZ 803                                                | Patient with periodontitis, C. Wyss, University of Zurich                                                                                           | Switzerland | Wyss 1998 (3)        |
| OMZ 899                                                | Not reported, C. Wyss (via G. Belibasakis, University of Zurich)                                                                                    | Switzerland | -                    |
| OMZ 906                                                | Not reported, C. Wyss, (via G. Belibasakis, University of Zurich)                                                                                   | Switzerland | -                    |
| <b><i>T. denticola</i> (n=41)</b>                      |                                                                                                                                                     |             |                      |
| ATCC 35405 <sup>1</sup> (strain a, OMZ 661, DSM 14222) | Subgingival plaque of patients, SL Cheng (via. B. McBride, University of Vancouver, and C. Wyss, University of Zurich)                              | Canada      | Cheng 1985 (8)       |
| ATCC 35404 (strain c, TD-4, OMZ 663)                   | Subgingival plaque of patients, SL Cheng (via. B. McBride, University of Vancouver, and C. Wyss, University of Zurich)                              | Canada      | Cheng 1985 (8)       |
| ATCC 33521 (strain 11, OMZ 662)                        | Subgingival plaque from patients with chronic periodontitis, E. Jacob (via. B. McBride, University of Vancouver, and C. Wyss, University of Zurich) | USA         | Jacob 1979 (9)       |
| ATCC 33520 (strain W)                                  | Subgingival plaque from patients with chronic periodontitis, E. Jacob (via. B. McBride, University of Vancouver, and C. Wyss, University of Zurich) | USA         | Jacob 1979 (9)       |
| ATCC 700771 (OMZ 834)                                  | Human ANUG lesion, C. Wyss, University of Zurich                                                                                                    | China       | Wyss 2004 (10)       |
| ATCC 700768 (OMZ 830)                                  | Human ANUG lesion, C. Wyss, University of Zurich                                                                                                    | China       | Wyss. 2004 (10)      |
| CD-1 (OMZ 294)                                         | Human subgingival plaque (via. B. McBride, University of Vancouver, and C. Wyss, University of Zurich)                                              | USA         | Boehringer 1984 (11) |
| S2                                                     | Clinical isolate from human oral cavity, T. Eguchi (via. B. McBride, University of Vancouver)                                                       | Japan       | Miyamoto 1991 (12)   |
| OTK                                                    | Deep periodontal pocket from human oral cavity, R Johnson (via. B. McBride, University of Vancouver, and C. Wyss, University of Zurich)             | USA         | Fenno 1997 (13)      |
| OKA3                                                   | Clinical isolate from human oral cavity, T. Eguchi (via. B. McBride, University of Vancouver)                                                       | Japan       | Miyamoto 1991 (12)   |
| OT2B                                                   | Periodontal pockets from human oral, by R Johnson (via. B. McBride, University of Vancouver)                                                        | USA         | Mo 2013 (14)         |
| MS25                                                   | Human periodontal pocket, by M. Sela (E.P. Greenberg, University of Washington)                                                                     | USA         | Weinberg 1990 (15)   |
| GM-1                                                   | Human periodontal pocket, by M. Sela (E.P. Greenberg, University of Washington)                                                                     | USA         | Weinberg 1990 (15)   |
| ST10 (OMZ 829)                                         | Human gingival crevice area, by S. S. Socransky (E.P. Greenberg, University of Washington, and C. Wyss, University of Zurich)                       | USA         | Hespell 1971 (16)    |
| NY 531                                                 | Gingival biopsy of human periodontitis, FH Mikx (via. B. McBride, University of Vancouver)                                                          | Netherlands | Mikx 1991 (17)       |
| NY 535                                                 | Gingival biopsy of human periodontitis, FH Mikx (via. B. McBride, University of Vancouver)                                                          | Netherlands | Mikx 1991 (17)       |
| NY 545                                                 | Gingival biopsy of human periodontitis, FH Mikx (via. B. McBride, University of Vancouver)                                                          | Netherlands | Mikx 1991 (17)       |
| NY 553                                                 | Gingival biopsy of human periodontitis, FH Mikx (via. B. McBride, University of Vancouver)                                                          | Netherlands | Mikx 1991 (17)       |
| F0402                                                  | Human subgingival dental plaque (strain not in our possession, data from HOMD and NCBI)                                                             | USA         | -                    |
| OMZ 823                                                | Not reported, C. Wyss, University of Zurich                                                                                                         | Switzerland | -                    |
| OMZ 845                                                | Human ANUG lesion, C. Wyss, University of Zurich                                                                                                    | China       | Wyss 2004 (10)       |
| OMZ 849                                                | Human ANUG lesion, C. Wyss, University of Zurich                                                                                                    | China       | Wyss 2004 (10)       |

|                                |                                                                                                               |             |                    |
|--------------------------------|---------------------------------------------------------------------------------------------------------------|-------------|--------------------|
| OMZ 850                        | Human ANUG lesion, C. Wyss, University of Zurich                                                              | China       | Wyss 2004 (10)     |
| OMZ 852                        | Human ANUG lesion, C. Wyss, University of Zurich                                                              | China       | Wyss 2004 (10)     |
| OMZ 853                        | Chinese gingivitis patient, C. Wyss, University of Zurich                                                     | China       | Mo 2013 (14)       |
| OMZ 854                        | Human ANUG lesion, C. Wyss, University of Zurich                                                              | China       | -                  |
| OMZ 898                        | Not reported, C. Wyss, University of Zurich                                                                   | Switzerland | -                  |
| OMZ 905                        | Swiss periodontitis patient, C Wyss, University of Zurich                                                     | Switzerland | Wyss 2004 (10)     |
| OMZ 908                        | Not reported, C. Wyss, University of Zurich                                                                   | Switzerland | -                  |
| OMZ 910                        | Swiss periodontitis patient, C Wyss, University of Zurich                                                     | Switzerland | -                  |
| H1-T (HMS-570)                 | Deep periodontal pocket (strain not in our possession, data from HOMD and NCBI)                               | USA         | -                  |
| SP37 (HMS-569)                 | Subgingival plaque from human deep periodontal pocket (strain not in our possession, data from HOMD and NCBI) | USA         | Salvador 1987 (18) |
| SP44                           | Not reported (strain not in our possession, data from HOMD and NCBI)                                          | USA         | -                  |
| SP33                           | Human subgingival plaque (strain not in our possession, data from HOMD and NCBI)                              | USA         | Salvador 1987 (18) |
| SP32                           | Not reported (strain not in our possession, data from HOMD and NCBI)                                          | USA         | -                  |
| SP23                           | Not reported (strain not in our possession, data from HOMD and NCBI)                                          | USA         | -                  |
| AL-2 (HMS-575)                 | Deep periodontal pocket (strain not in our possession, data from HOMD and NCBI)                               | USA         | -                  |
| ASLM (HMS-574)                 | Subgingival plaque from human deep periodontal pocket (strain not in our possession, data from HOMD and NCBI) | USA         | Ohta 1986 (19)     |
| US-Trep (HMS-573)              | Subgingival plaque from human deep periodontal pocket (strain not in our possession, data from HOMD and NCBI) | USA         | Salvador 1987 (18) |
| MYR-T (HMS-572)                | Not reported (strain not in our possession, data from HOMD and NCBI)                                          | USA         | -                  |
| H-22 (HMS-571)                 | Deep periodontal pocket (strain not in our possession, data from HOMD and NCBI)                               | USA         | -                  |
| <b><i>T. putidum</i> (n=7)</b> |                                                                                                               |             |                    |
| ATCC 700334 (OMZ 758)          | Subgingival plaque of periodontal lesion, C. Wyss, University of Zurich                                       | Switzerland | Wyss 2004 (10)     |
| OMZ 730                        | Swiss periodontitis, C. Wyss, University of Zurich                                                            | Switzerland | Wyss 2004 (10)     |
| OMZ 835                        | Human ANUG lesion, C. Wyss, University of Zurich                                                              | China       | Wyss 2004 (10)     |
| OMZ 844                        | Swiss periodontitis, C. Wyss, University of Zurich                                                            | Switzerland | Wyss 2004 (10)     |
| OMZ 846                        | Human ANUG lesion, C. Wyss, University of Zurich                                                              | China       | Wyss 2004 (10)     |
| OMZ 847                        | Human ANUG lesion, C. Wyss, University of Zurich                                                              | China       | Wyss 2004 (10)     |
| OMZ 848                        | Human subgingival plaque, C. Wyss, University of Zurich                                                       | China       | Wyss 2004 (10)     |

**Table S2** Accession numbers/genomic locus tags for *flaA*, *recA*, *pyrH* and 16S rRNA genes included in this study

Sequences generated in this study were in bold font-type; x indicates gene sequences not included in the analysis.

| <i>Species</i>                              | Strain                                       | 16S rRNA           | <i>flaA</i>        | <i>recA</i>        | <i>pyrH</i>        |
|---------------------------------------------|----------------------------------------------|--------------------|--------------------|--------------------|--------------------|
| ' <i>T. vincentii</i> '                     | ATCC 35580, OMZ 293, LA-1                    | TREVI0001_RS05400  | TREVI0001_RS03195  | TREVI0001_RS08670  | TREVI0001_RS08100  |
| ' <i>T. vincentii</i> '                     | ATCC 700013 (OMZ 779, N9, F0403)             | NZ_KE332514        | ATFC01000002       | ATFC01000001       | ATFC01000001       |
| ' <i>T. vincentii</i> '                     | ATCC 700765 (OMZ 800)                        | <b>KT192150</b>    | <b>KU877111</b>    | <b>KU877133</b>    | <b>KU877151</b>    |
| ' <i>T. vincentii</i> '                     | ATCC 700774 (OMZ 860)                        | AY369251           | <b>KP144319</b>    | <b>KP144320</b>    | <b>KP144321</b>    |
| ' <i>T. vincentii</i> '                     | OMZ 801                                      | <b>KT192151</b>    | <b>KU877112</b>    | <b>KU877134</b>    | <b>KU877152</b>    |
| ' <i>T. vincentii</i> '                     | OMZ 802                                      | <b>KT192152</b>    | <b>KU877113</b>    | <b>KU877135</b>    | <b>KU877153</b>    |
| ' <i>T. vincentii</i> '                     | OMZ 858                                      | <b>KT192153</b>    | <b>KU877114</b>    | <b>KU877136</b>    | <b>KU877154</b>    |
| ' <i>T. vincentii</i> '                     | OMZ 859                                      | <b>KT192154</b>    | <b>KU877115</b>    | <b>KU877137</b>    | <b>KU877155</b>    |
| ' <i>T. vincentii</i> '                     | OMZ 861                                      | <b>KT192155</b>    | <b>KU877116</b>    | <b>KU877138</b>    | <b>KU877156</b>    |
| ' <i>T. vincentii</i> '                     | OMZ 862                                      | <b>KT192156</b>    | <b>KU877117</b>    | <b>KU877139</b>    | <b>KU877157</b>    |
| ' <i>T. vincentii</i> '                     | OMZ 863                                      | <b>KT192157</b>    | <b>KU877118</b>    | <b>KU877140</b>    | <b>KU877158</b>    |
| <i>T. medium</i>                            | ATCC 700293 <sup>T</sup> (ex G7021, OMZ 824) | HMPREF9195_RS07345 | HMPREF9195_RS10500 | HMPREF9195_RS10255 | HMPREF9195_RS07420 |
| ' <i>T. sinensis</i> ' ( <i>T. sp. IA</i> ) | ATCC 700772 (OMZ 838, DSM 16789)             | <b>KP101523</b>    | <b>KP101534</b>    | <b>KP101551</b>    | <b>KP101568</b>    |
| ' <i>T. sinensis</i> ' ( <i>T. sp. IA</i> ) | OMZ 855                                      | <b>KP101524</b>    | <b>KP101535</b>    | <b>KP101552</b>    | <b>KP101569</b>    |
| ' <i>T. sinensis</i> ' ( <i>T. sp. IA</i> ) | OMZ 856                                      | <b>KP101525</b>    | <b>KP101536</b>    | <b>KP101553</b>    | <b>KP101570</b>    |
| ' <i>T. sinensis</i> ' ( <i>T. sp. IA</i> ) | OMZ 857                                      | <b>KP101526</b>    | <b>KP101537</b>    | <b>KP101554</b>    | <b>KP101571</b>    |
| <i>T. sp. IB</i>                            | OMZ 305 (' <i>T. vincentii</i> ' Ritz A)     | <b>KP101521</b>    | <b>KU877119</b>    | <b>KP101549</b>    | <b>KP101566</b>    |
| <i>T. sp. IB</i>                            | OMZ 805                                      | <b>KT192148</b>    | <b>KU877120</b>    | <b>KU877131</b>    | <b>KU877149</b>    |
| <i>T. sp. IB</i>                            | ATCC 700767 (OMZ 806)                        | <b>KP101522</b>    | <b>KU877121</b>    | <b>KP101550</b>    | <b>KP101567</b>    |
| <i>T. sp. IC</i>                            | ATCC 700766 (OMZ 804, MH1F1)                 | <b>KP101520</b>    | <b>KP101533</b>    | <b>KP101548</b>    | <b>KP101565</b>    |
| <i>T. sp. IC</i>                            | OMZ 803                                      | <b>KT192149</b>    | <b>KU877122</b>    | <b>KU877132</b>    | <b>KU877150</b>    |
| <i>T. sp. IC</i>                            | OMZ 899                                      | <b>KT192158</b>    | <b>KU877123</b>    | <b>KU877141</b>    | <b>KU877159</b>    |
| <i>T. sp. IC</i>                            | OMZ 906                                      | <b>KT192159</b>    | <b>KU877124</b>    | <b>KU877142</b>    | <b>KU877160</b>    |
| <i>T. denticola</i>                         | ATCC 35405 <sup>T</sup> (strain a, OMZ 661)  | NR_074582          | AE017226           | AE017226           | AE017226           |
| <i>T. denticola</i>                         | ATCC 35404 (strain c, TD-4, OMZ 663)         | AGDU01000028       | JF700269           | JF700284           | JF700299           |

|                     |                                 |                  |                  |                  |                  |
|---------------------|---------------------------------|------------------|------------------|------------------|------------------|
| <i>T. denticola</i> | ATCC 33521 (strain 11, OMZ 662) | NZ_AGDT01000020  | JF700270         | JF700285         | JF700300         |
| <i>T. denticola</i> | ATCC 33520 (strain W)           | AGDS01000001     | JF700271         | JF700286         | JF700301         |
| <i>T. denticola</i> | ATCC 700771 (OMZ 834)           | JF700257         | JF700272         | JF700287         | JF700302         |
| <i>T. denticola</i> | ATCC 700768 (OMZ 830)           | JF700258         | JF700273         | JF700288         | JF700303         |
| <i>T. denticola</i> | CD-1 (OMZ 294)                  | JF700259         | JF700274         | JF700289         | JF700304         |
| <i>T. denticola</i> | S2                              | JF700266         | JF700281         | JF700296         | JF700311         |
| <i>T. denticola</i> | OTK                             | JF700263         | JF700278         | JF700293         | JF700308         |
| <i>T. denticola</i> | OKA3                            | JF700267         | JF700282         | JF700297         | JF700312         |
| <i>T. denticola</i> | OT2B                            | JF700264         | JF700279         | JF700294         | JF700309         |
| <i>T. denticola</i> | MS25                            | JF700260         | JF700275         | JF700290         | JF700305         |
| <i>T. denticola</i> | GM-1                            | JF700268         | JF700283         | JF700298         | JF700313         |
| <i>T. denticola</i> | ST10 (OMZ 829)                  | JF700265         | JF700280         | JF700295         | JF700310         |
| <i>T. denticola</i> | NY531                           | KC415232         | KC415220         | KC415208         | KC415216         |
| <i>T. denticola</i> | NY535                           | JF700261         | JF700276         | JF700291         | JF700306         |
| <i>T. denticola</i> | NY545                           | JF700262         | JF700277         | JF700292         | JF700307         |
| <i>T. denticola</i> | NY553                           | KC415233         | KC415221         | KC415209         | KC415217         |
| <i>T. denticola</i> | F0402                           | GU470911         | ADEC01000021     | ADEC01000021     | ADEC01000013     |
| <i>T. denticola</i> | OMZ 823                         | <b>KT192142</b>  | <b>KU877125</b>  | <b>KU877143</b>  | <b>KU877161</b>  |
| <i>T. denticola</i> | OMZ 845                         | <b>KT192143</b>  | <b>KU877126</b>  | <b>KU877144</b>  | <b>KU877162</b>  |
| <i>T. denticola</i> | OMZ 849                         | <b>KT192144</b>  | <b>KU877127</b>  | <b>KU877145</b>  | <b>KU877163</b>  |
| <i>T. denticola</i> | OMZ 850                         | <b>KT192145</b>  | <b>KU877128</b>  | <b>KU877146</b>  | <b>KU877164</b>  |
| <i>T. denticola</i> | OMZ 852                         | KC415234         | KC415222         | KC415210         | KC415218         |
| <i>T. denticola</i> | OMZ 853                         | KC415235         | KC415223         | KC415211         | KC415219         |
| <i>T. denticola</i> | OMZ 854                         | <b>KP101527</b>  | <b>KP101538</b>  | <b>KP101555</b>  | <b>KP101572</b>  |
| <i>T. denticola</i> | OMZ 898                         | <b>KT192146</b>  | <b>KU877129</b>  | <b>KU877147</b>  | <b>KU877165</b>  |
| <i>T. denticola</i> | OMZ 905                         | <b>KP101528</b>  | <b>KP101539</b>  | <b>KP101556</b>  | <b>KP101573</b>  |
| <i>T. denticola</i> | OMZ 908                         | <b>KT192147</b>  | <b>KU877130</b>  | <b>KU877148</b>  | <b>KU877166</b>  |
| <i>T. denticola</i> | OMZ 910                         | <b>KP101529</b>  | <b>KP101540</b>  | <b>KP101557</b>  | <b>KP101574</b>  |
| <i>T. denticola</i> | H1-T (HMS-570)                  | AGDW01000001     | NZ_CM001794      | NZ_CM001794      | NZ_CM001794      |
| <i>T. denticola</i> | SP37 (HMS-569)                  | NZ_AGEA01000015  | NZ_AGEA01000019  | NZ_AGEA01000014  | NZ_AGEA01000019  |
| <i>T. denticola</i> | SP44                            | HMPREF9734_02040 | HMPREF9734_02547 | HMPREF9734_00235 | HMPREF9734_01748 |
| <i>T. denticola</i> | SP33                            | NZ_AGDZ01000027  | NZ_AGDZ01000028  | NZ_AGDZ01000019  | NZ_AGDZ01000028  |

|                            |                          |                  |                  |                  |                  |
|----------------------------|--------------------------|------------------|------------------|------------------|------------------|
| <i>T. denticola</i>        | SP32                     | HMPREF9732_02527 | HMPREF9732_02014 | HMPREF9732_00695 | HMPREF9732_00346 |
| <i>T. denticola</i>        | SP23                     | HMPREF9731_02148 | HMPREF9731_00562 | HMPREF9731_02422 | HMPREF9731_00908 |
| <i>T. denticola</i>        | AL-2 (HMS-575)           | AGDQ01000003     | NZ_CM001798      | NZ_CM001798      | NZ_CM001798      |
| <i>T. denticola</i>        | ASLM (HMS-574)           | AGDR01000029     | NZ_KB445544      | NZ_KB445544      | NZ_KB445544      |
| <i>T. denticola</i>        | US-Trep (HMS-573)        | AGEB01000003     | NZ_KB454450      | NZ_KB454450      | NZ_KB454450      |
| <i>T. denticola</i>        | MYR-T (HMS-572)          | NZ_AGDX01000020  | NZ_AGDX01000008  | NZ_AGDX01000016  | NZ_AGDX01000008  |
| <i>T. denticola</i>        | H-22 (HMS-571)           | AGDV01000020     | NZ_CM001795      | NZ_CM001795      | NZ_CM001795      |
| <i>T. putidum</i>          | ATCC 700334 (OMZ 758)    | <b>KP101531</b>  | <b>KP101542</b>  | <b>KP101559</b>  | <b>KP101576</b>  |
| <i>T. putidum</i>          | OMZ 730                  | <b>KP101530</b>  | <b>KP101541</b>  | <b>KP101558</b>  | <b>KP101575</b>  |
| <i>T. putidum</i>          | OMZ 835                  | <b>KP101532</b>  | <b>KP101543</b>  | <b>KP101560</b>  | <b>KP101577</b>  |
| <i>T. putidum</i>          | OMZ 844                  | <b>JN244657</b>  | <b>KP101544</b>  | <b>KP101561</b>  | <b>KP101578</b>  |
| <i>T. putidum</i>          | OMZ 846                  | <b>JN244658</b>  | <b>KP101545</b>  | <b>KP101562</b>  | <b>KP101579</b>  |
| <i>T. putidum</i>          | OMZ 847                  | <b>JN244659</b>  | <b>KP101546</b>  | <b>KP101563</b>  | <b>KP101580</b>  |
| <i>T. putidum</i>          | OMZ 848                  | <b>JN244660</b>  | <b>KP101547</b>  | <b>KP101564</b>  | <b>KP101581</b>  |
| <i>T. lecithinolyticum</i> | ATCC 700332 <sup>T</sup> | NR_026247        | ERJ92394         | ERJ92362         | ERJ93324         |
| <i>T. phagedenis</i>       | F0421                    | NZ_AEFH01000000  | x                | x                | x                |
| <i>T. pallidum</i>         | Nichols                  | NR_074357        | x                | x                | x                |

**Table S3** Summary of polymorphic sites, nucleotide diversity per site, global rate ratios, and positively/negatively selected codon sites at the phylogroup level

|                       | <b>Gene</b> | <b>No. of nt</b> | <b>No. of codon</b> | <b>No. of polymorphic sites (%)</b> | <b>Nucleotide diversity (<math>\pi</math>)</b> | <b>Mean dN/dS (global <math>\omega</math>; 95% CI)</b> | <b>No. of negatively selected sites (%)</b> | <b>No. of positively selected sites</b> |
|-----------------------|-------------|------------------|---------------------|-------------------------------------|------------------------------------------------|--------------------------------------------------------|---------------------------------------------|-----------------------------------------|
| Phylogroup1<br>(n=23) | <i>flaA</i> | 1071             | 355                 | 217 (20.26)                         | 0.079±0.0078                                   | 0.088 (0.070, 0.109)                                   | 25 (7.04)                                   | 0                                       |
|                       | <i>recA</i> | 1368             | 455                 | 313 (22.88)                         | 0.095±0.0067                                   | 0.300 (0.276, 0.326)                                   | 54 (11.9)                                   | 0                                       |
|                       | <i>pyrH</i> | 687              | 228                 | 172 (25.04)                         | 0.098±0.0065                                   | 0.070 (0.053, 0.091)                                   | 31 (13.6)                                   | 0                                       |
|                       | 16S         | 1502             | n/a                 | 38 (2.52)                           | 0.009±0.0007                                   | n/a                                                    | n/a                                         | n/a                                     |
| Phylogroup2<br>(n=48) | <i>flaA</i> | 1050             | 349                 | 266 (24.43)                         | 0.054±0.0086                                   | 0.115 (0.093, 0.139)                                   | 24 (6.88)                                   | 0                                       |
|                       | <i>recA</i> | 1245             | 414                 | 236 (18.96)                         | 0.042±0.0031                                   | 0.103 (0.087, 0.121)                                   | 74 (17.9)                                   | 1                                       |
|                       | <i>pyrH</i> | 696              | 231                 | 170 (24.43)                         | 0.064±0.0102                                   | 0.082 (0.063, 0.105)                                   | 30 (13.0)                                   | 0                                       |
|                       | 16S         | 1498             | n/a                 | 41 (2.74)                           | 0.006±0.0009                                   | n/a                                                    | n/a                                         | n/a                                     |
| Overall<br>(n=71)     | <i>flaA</i> | 1074             | 355                 | 467 (43.48)                         | 0.162±0.0112                                   | 0.115 (0.102, 0.130)                                   | 74 (20.8)                                   | 0                                       |
|                       | <i>recA</i> | 1377             | 455                 | 537 (39.00)                         | 0.172±0.0130                                   | 0.211(0.197, 0.225)                                    | 104 (22.9)                                  | 1                                       |
|                       | <i>pyrH</i> | 696              | 231                 | 321 (46.12)                         | 0.188±0.0130                                   | 0.119 (0.106, 0.134)                                   | 57 (24.7)                                   | 0                                       |
|                       | 16S         | 1503             | n/a                 | 161 (10.71)                         | 0.042±0.0033                                   | n/a                                                    | n/a                                         | n/a                                     |

**Table S4** Intra- and interspecific sequence similarities for treponeme 16S rRNA, *flaA*, *pyrH* and *recA* genes analyzed

| Taxa                                                                | intraspecific sequence similarities in % |                    |                    |                    |
|---------------------------------------------------------------------|------------------------------------------|--------------------|--------------------|--------------------|
|                                                                     | interspecific sequence similarities in % |                    |                    |                    |
|                                                                     | 16S rRNA                                 | <i>flaA</i>        | <i>recA</i>        | <i>pyrH</i>        |
| <b><i>T. denticola</i></b><br>(n = 41)                              | 99.7 (98.9 - 100)                        | 96.9 (83.4 - 100)  | 96.3 (93.1 - 100)  | 96.6 (82.9 - 100)  |
|                                                                     | 92.7 (90.5 - 99.3)                       | 75.0 (69.2 - 87.7) | 70.2 (60.3 - 96.7) | 69.6 (64.1 - 89.6) |
| <b><i>T. putidum</i></b><br>(n = 7)                                 | 99.4 (98.7 - 99.9)                       | 99.9 (99.8 - 100)  | 94.0 (91.9 - 100)  | 99.8 (99.6 - 100)  |
|                                                                     | 95.8 (90.5 - 99.3)                       | 81.0 (69.0 - 87.7) | 82.9 (60.4 - 96.7) | 76.7 (64.0 - 89.6) |
| <b>'<i>T. vincentii</i>'</b><br>(n = 11)                            | 99.9 (99.8 - 100)                        | 99.3 (98.7 - 100)  | 99.5 (99.2 - 99.9) | 96.8 (85.1 - 100)  |
|                                                                     | 91.0 (90.5 - 99.0)                       | 74.7 (70.4 - 91.1) | 66.3 (62.5 - 81.5) | 69.4 (64.5 - 87.9) |
| <b>'<i>T. sinensis</i>'</b><br><b>(<i>T. sp. IA</i>)</b><br>(n = 4) | 100 (-)                                  | 99.7 (99.5 - 99.9) | 98.0 (96.5 - 99.8) | 98.1 (97 - 99)     |
|                                                                     | 93.1 (90.6 - 99.5)                       | 76.7 (70.7 - 91.2) | 68.5 (61.6 - 91.2) | 71.1 (64.0 - 91.9) |
| <b><i>T. sp. IB</i></b><br>(n = 3)                                  | 99.6 (99.5 - 99.6)                       | 99.7 (99.6 - 99.8) | 93.3 (89.9 - 99.8) | 100 (-)            |
|                                                                     | 93.2 (90.6 - 99.1)                       | 76.0 (70.2 - 88.6) | 67.9 (60.3 - 90.5) | 71.4 (64.6 - 88.4) |
| <b><i>T. sp. IC</i></b><br>(n = 4)                                  | 99.8 (99.7 - 99.9)                       | 99.8 (99.7 - 99.8) | 98.2 (97.2 - 99.5) | 99.0 (98.4 - 99.5) |
|                                                                     | 93.0 (90.5 - 99.5)                       | 75.3 (69.0 - 91.2) | 67.8 (61.1 - 91.2) | 70.9 (64.1 - 91.9) |
| <b>Overall</b><br>(n = 71)                                          | 99.6 (98.7 - 100)                        | 97.2 (83.4 - 100)  | 96.5 (89.9 - 100)  | 96.7 (82.9 - 100)  |
|                                                                     | 93.2 (90.5 - 99.5)                       | 76.1 (69.0 - 91.2) | 70.7 (60.3 - 96.7) | 71.0 (64.0 - 91.9) |



**Fig. S1 ML phylogenetic trees of individual (A) *recA* and (B) *pyrH* genes**

Refer to Fig. 1 legend for explanatory details.

**(A)**

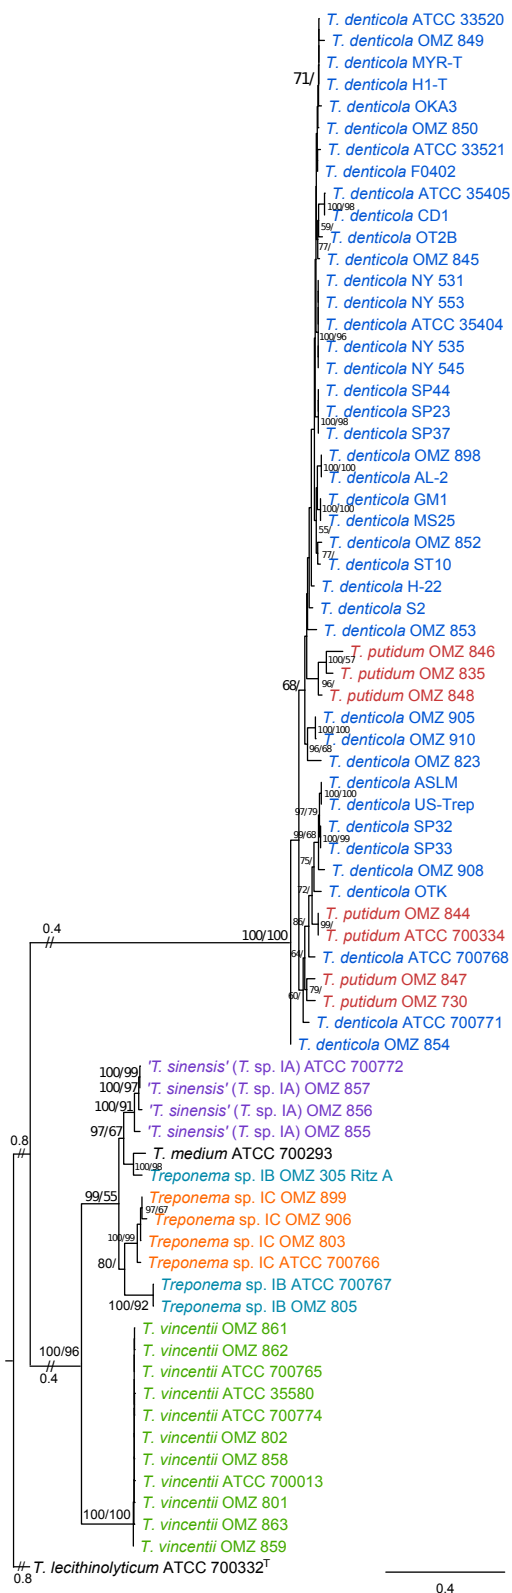

(B)

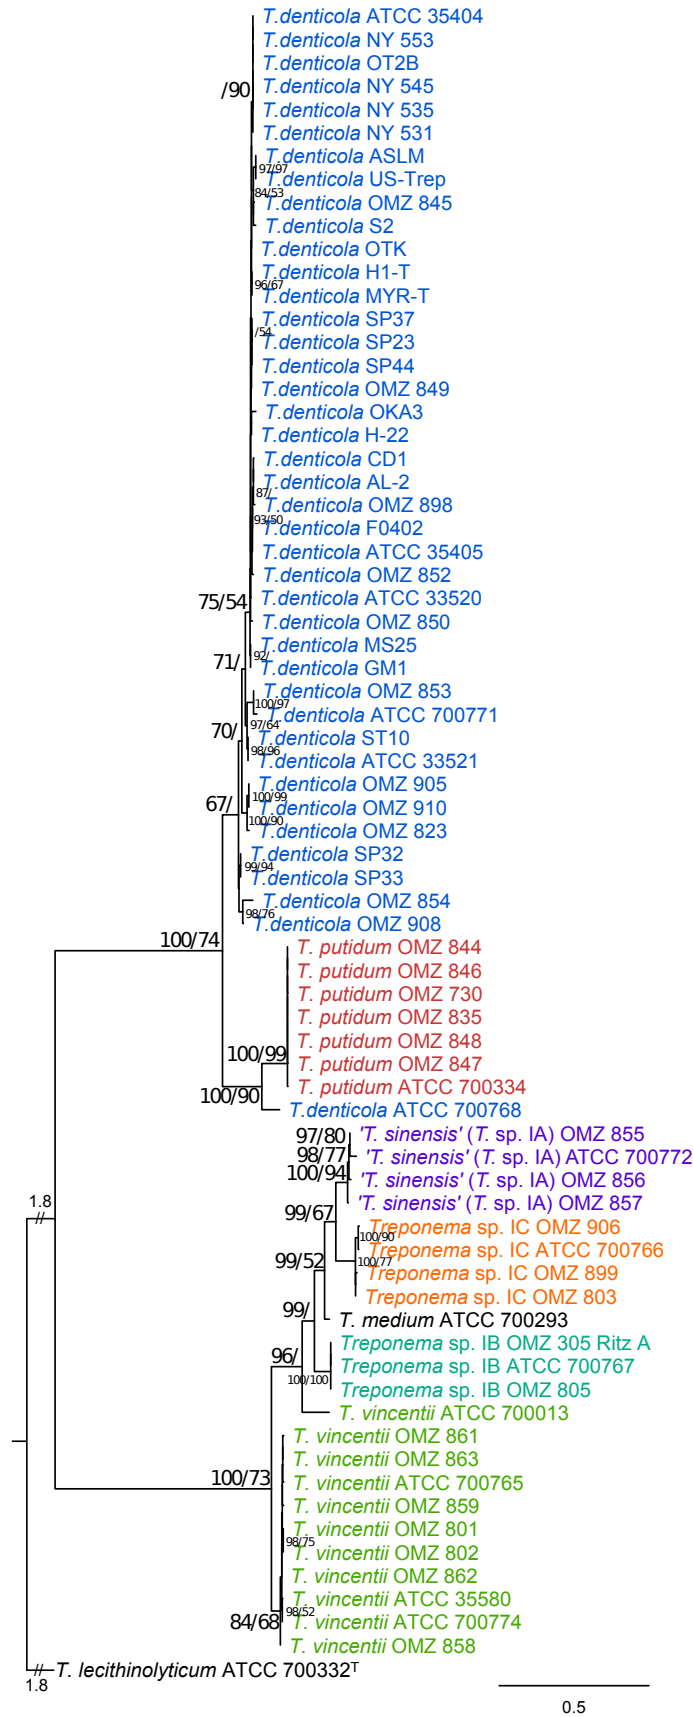

**Fig. S2 ML phylogenetic trees constructed from concatenated (A) *flaA-recA* (B) *flaA-pyrH* and (C) *pyrH-recA* genes**

Refer to Fig. 1 legend for explanatory details.

(A)

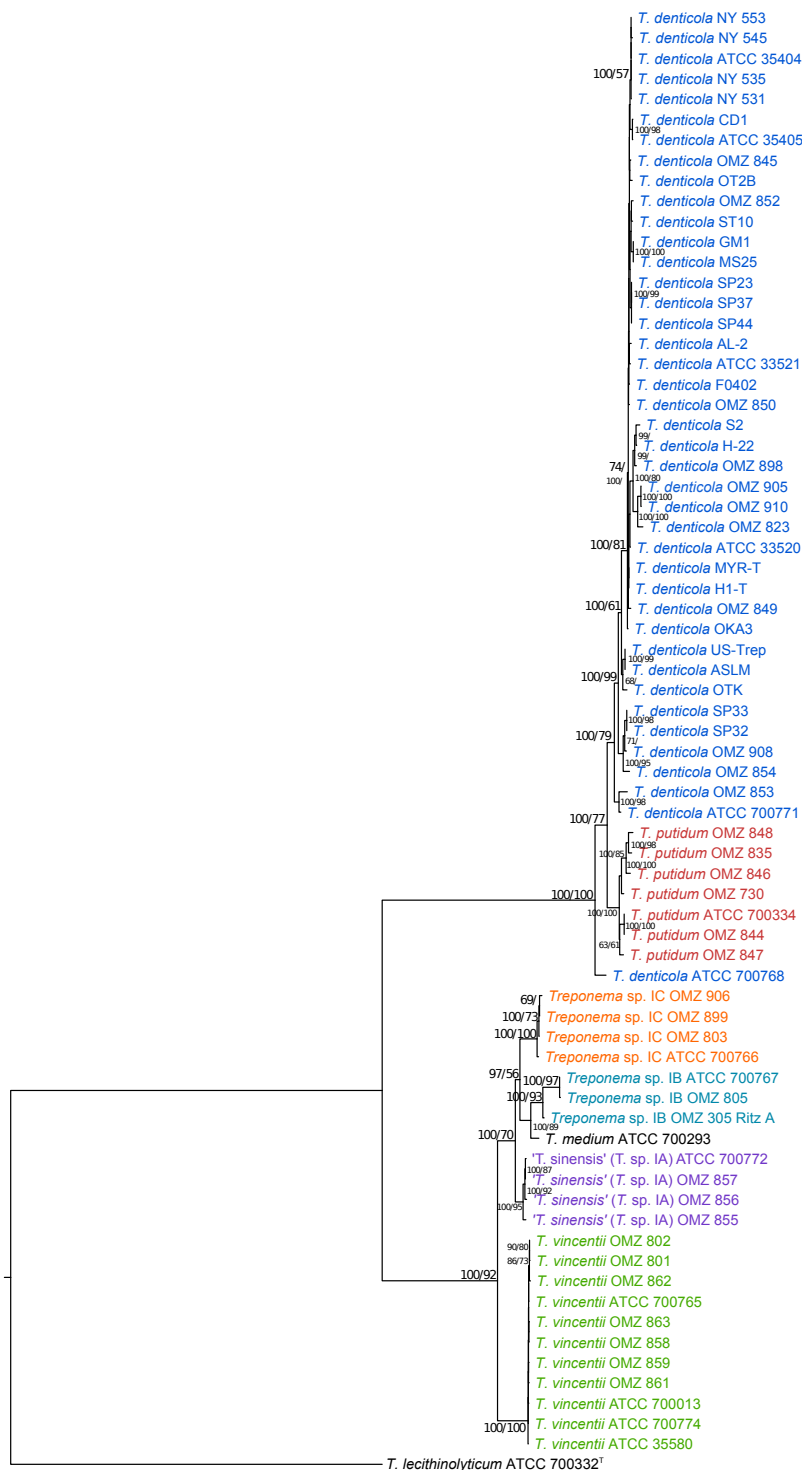

0.4

(B)

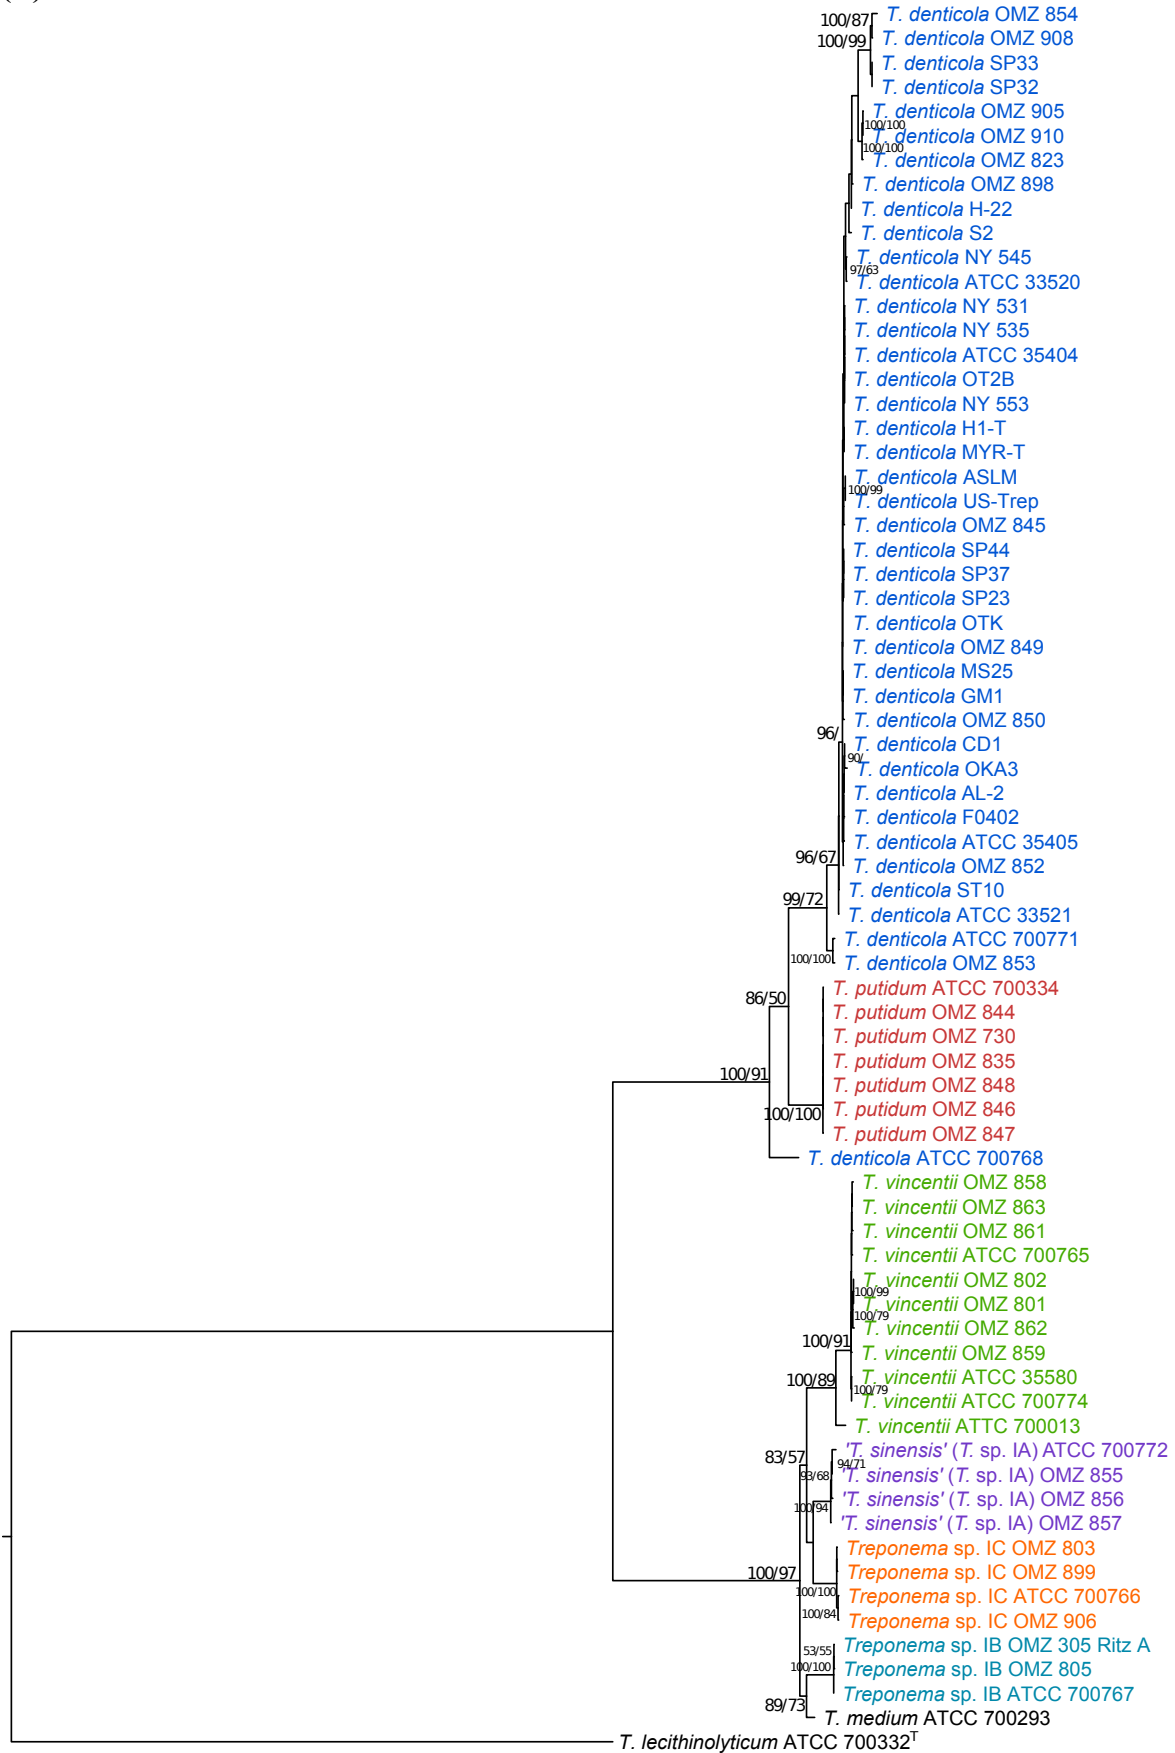

0.5

(C)

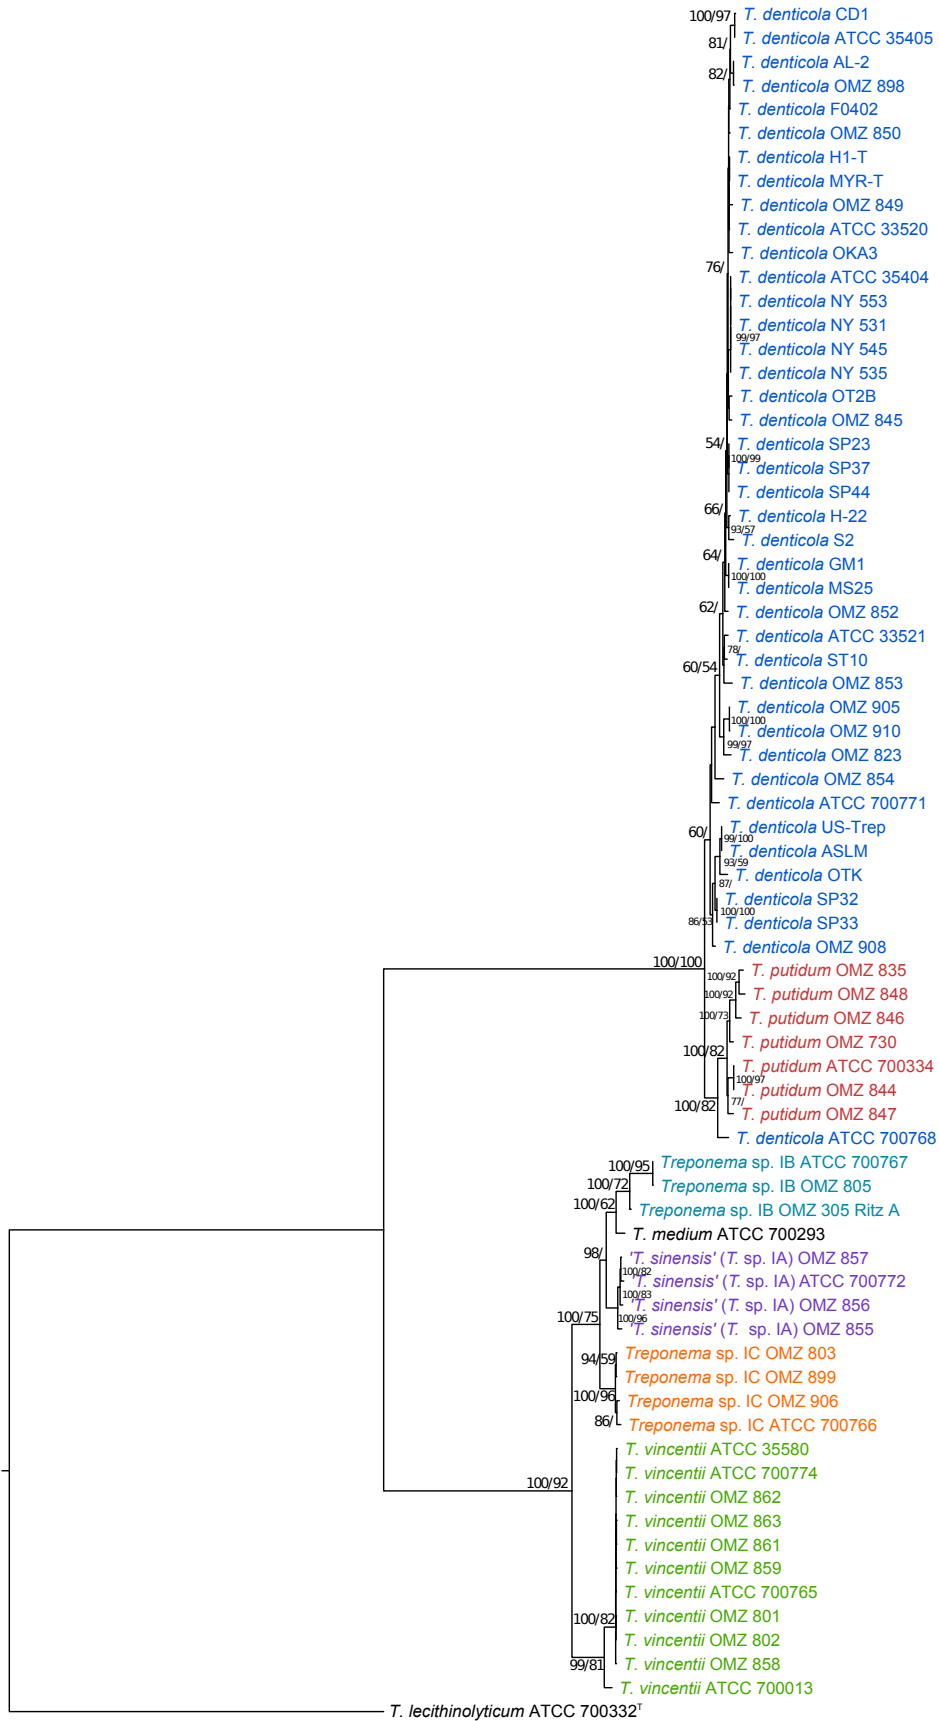

0.4

Fig. S3 Annotated multiple sequence alignment of RecA protein sequences from representative treponeme strains

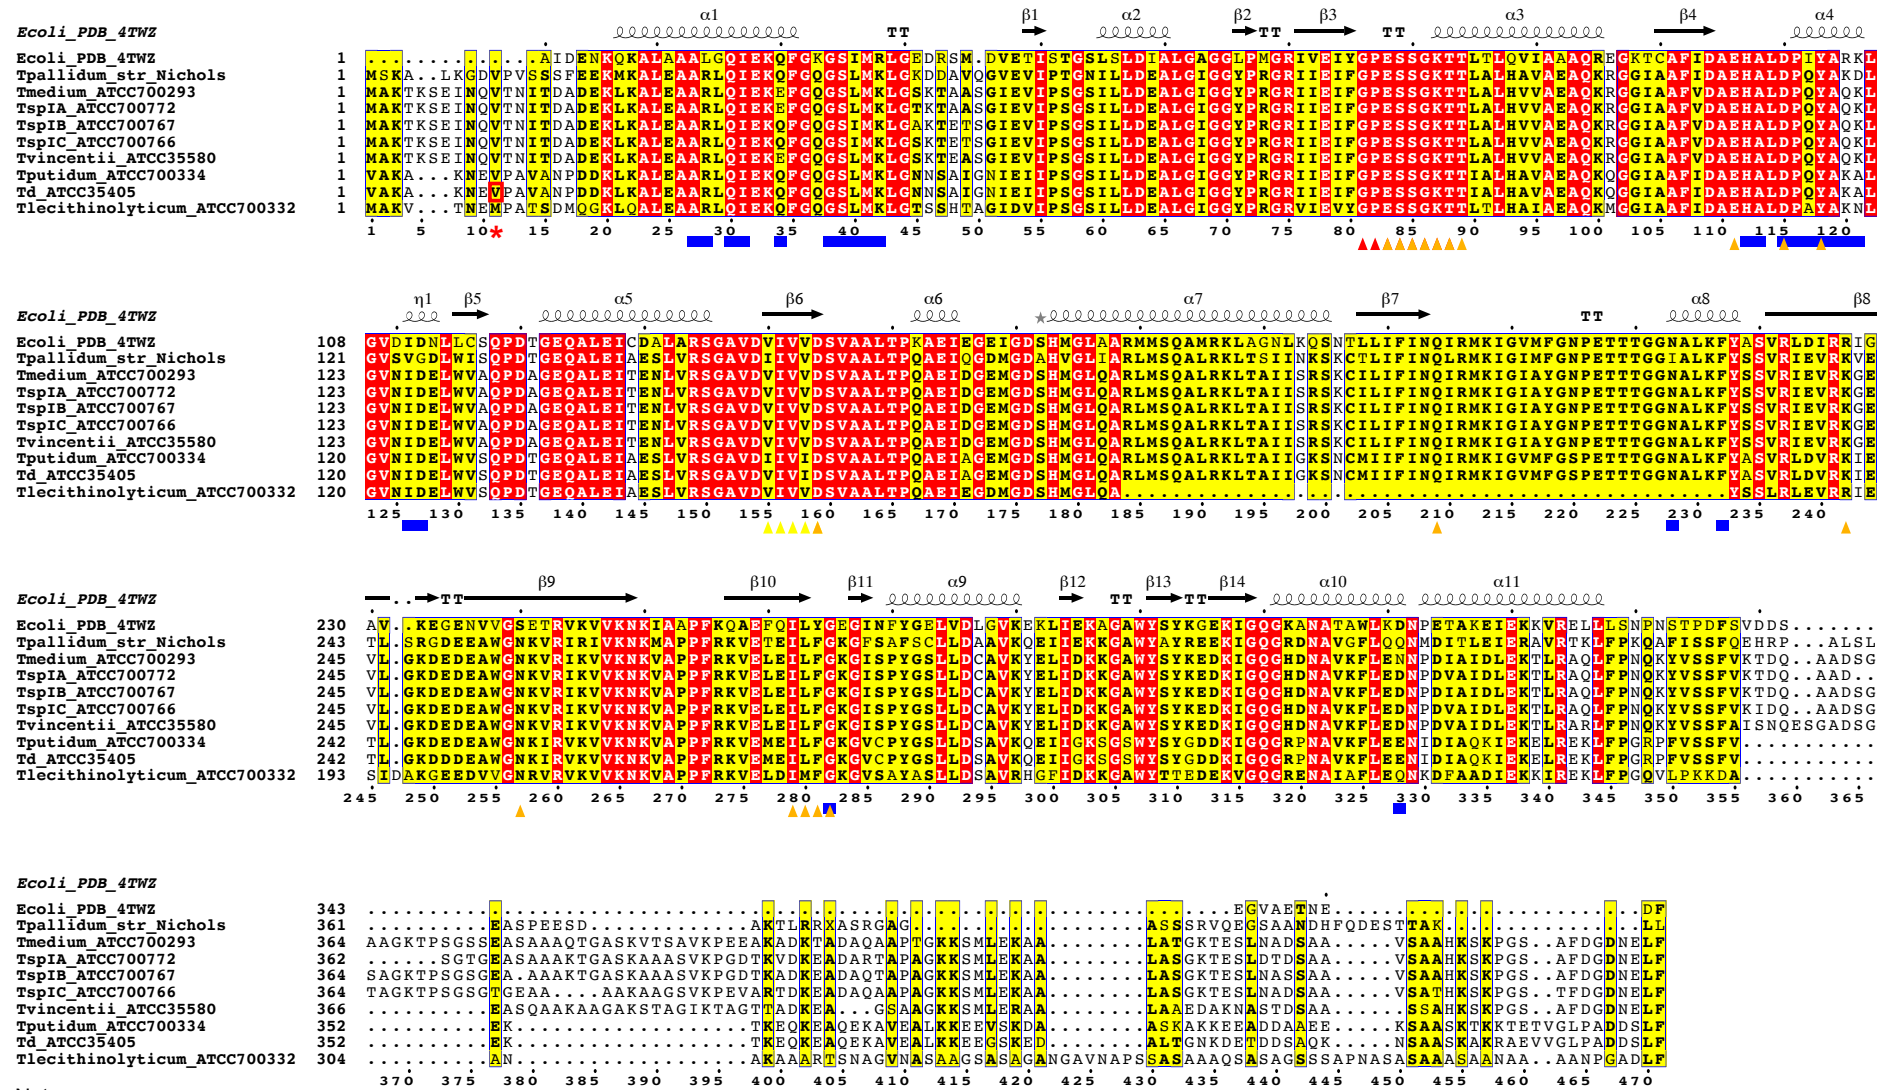

Note:

- ▲ ATP binding (chemical binding site) contains walker A ▲ and B ▲ motifs
- Hexamer interface (polypeptide binding site)
- \* Positively selected site: Val-8 in *T. denticola*

**Fig. S4 Average intraspecific sequence similarity (%) for 16S rRNA, *flaA*, *recA* and *pyrH* genes**

The average intraspecific sequence similarities (in %) are presented on the y-axis in this bar-chart, with values in reverse order. Each species/phylotype is represented using the same colour scheme used in Fig. 1 - 4.

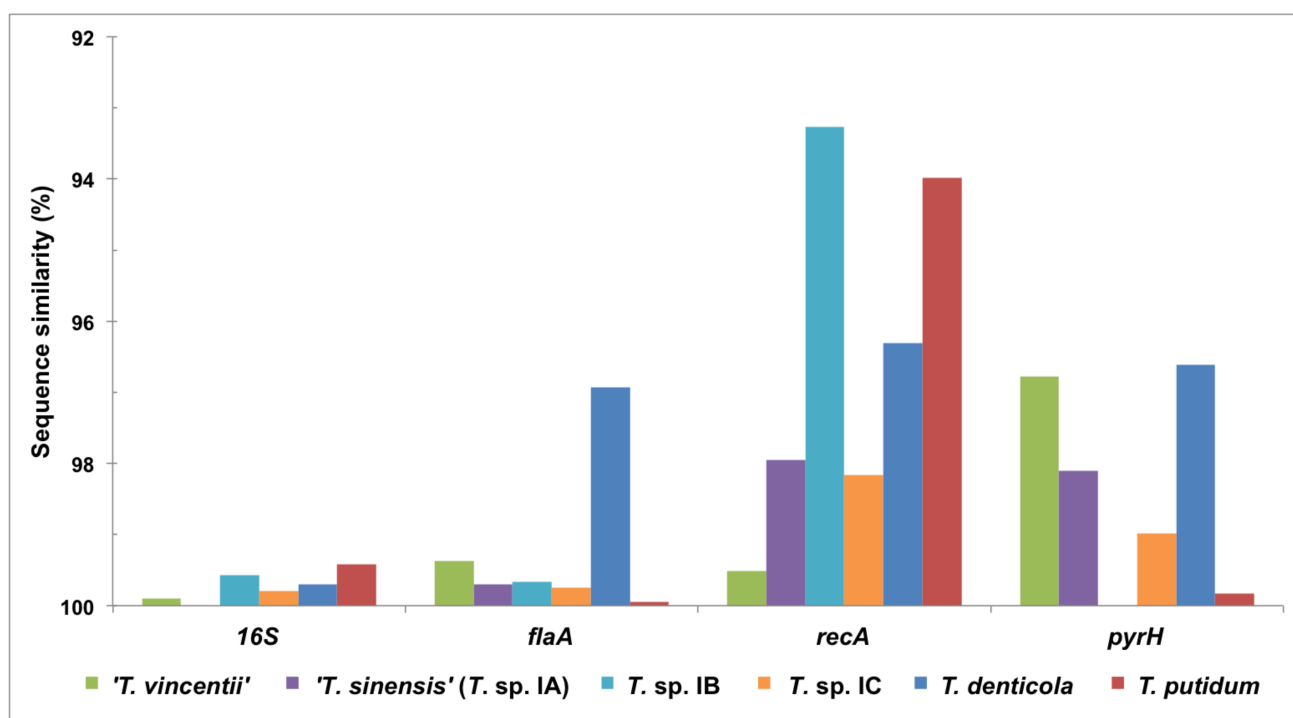

**Fig. S5 Intra- and interspecific sequence similarity (%) across all treponemes (Panels A to D:**

16S rRNA, *flaA*, *recA*, *pyrH* gene)

Refer to Fig. 5 legend for explanatory details.

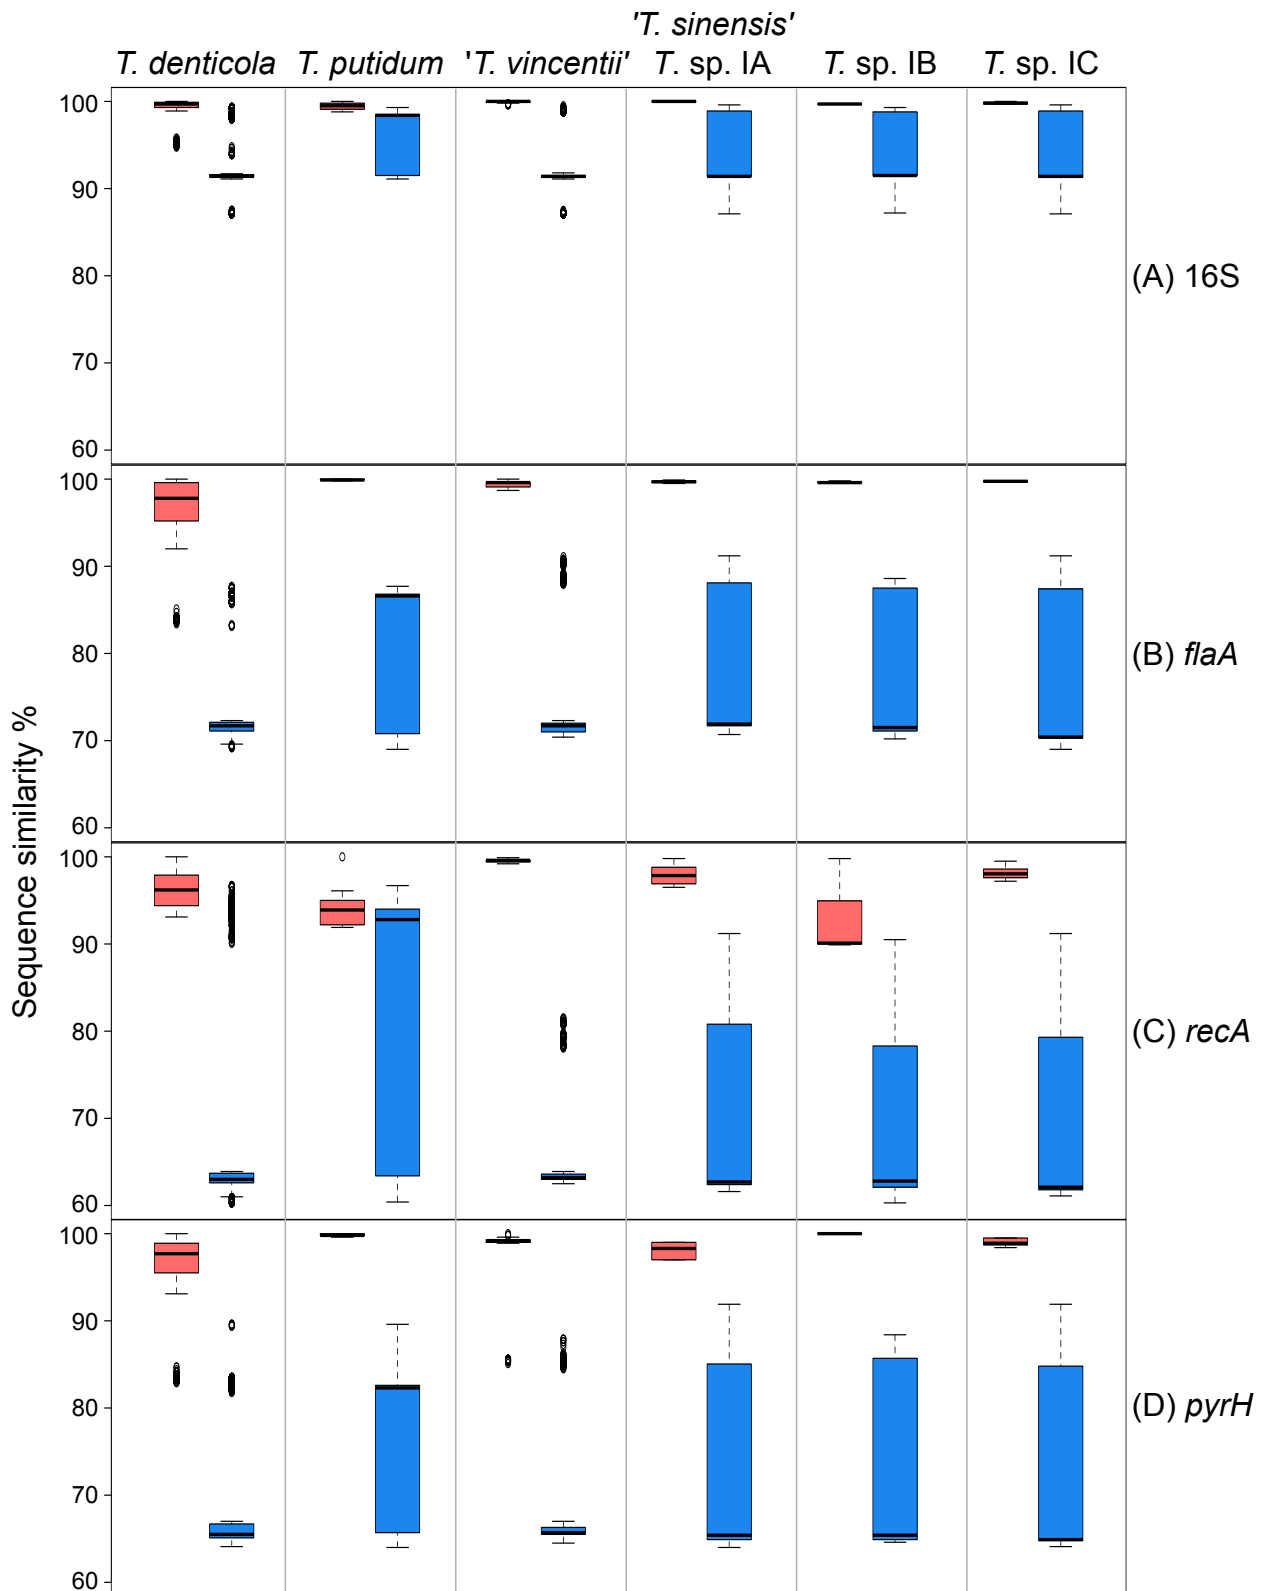



**Fig. S6 ML phylogenetic tree of *recA* genes from human oral treponemes and from animal (digital dermatitis lesion) treponemes**

Refer to Fig. 1 legend for explanatory details. The monophyletic branches representing the animal treponemes were collapsed.

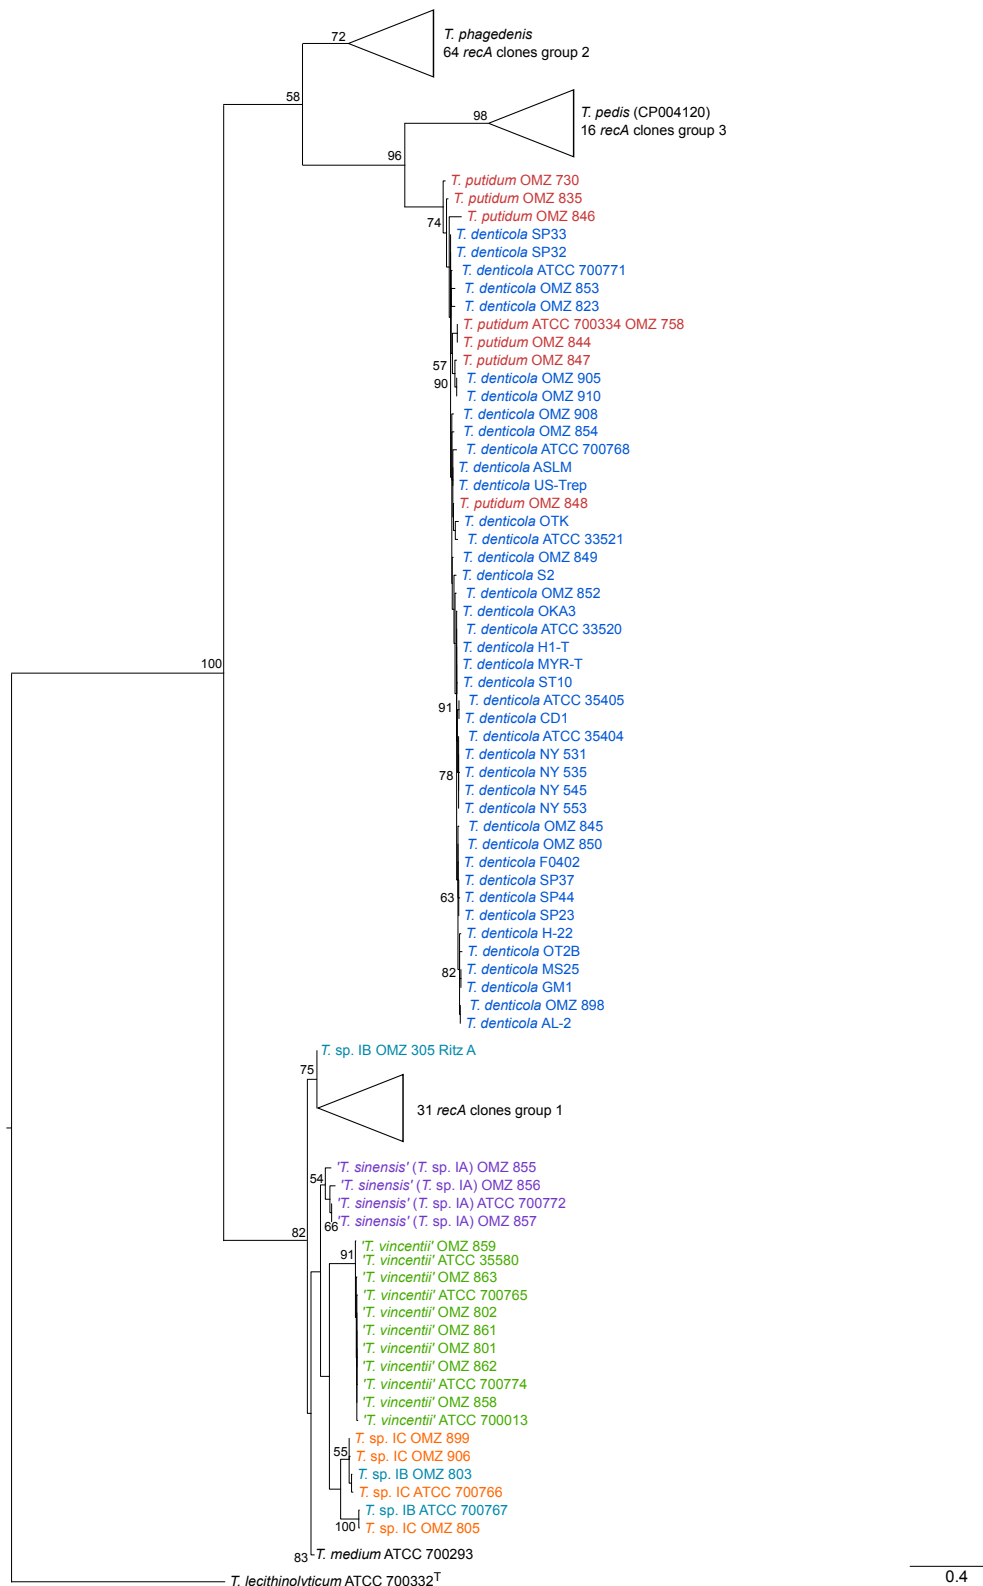

## References

1. **Mangan DF, Laughon BE, Bower B, Lopatin DE.** 1982. *In vitro* lymphocyte blastogenic responses and titers of humoral antibodies from periodontitis patients to oral spirochete isolates. *Infect Immun* **37**:445-451.
2. **Paster BJ, Dewhirst FE, Coleman BC, Lau CN, Ericson RL.** 1998. Phylogenetic analysis of cultivable oral treponemes from the Smibert collection. *Int J Syst Bacteriol* **48 Pt 3**:713-722.
3. **Wyss C.** 1998. Flagellins, but not endoflagellar sheath proteins, of *Treponema pallidum* and of pathogen-related oral spirochetes are glycosylated. *Infect Immun* **66**:5751-5754.
4. **Correia FF, Plummer AR, Ellen RP, Wyss C, Boches SK, Galvin JL, Paster BJ, Dewhirst FE.** 2003. Two paralogous families of a two-gene subtilisin operon are widely distributed in oral treponemes. *J Bacteriol* **185**:6860-6869.
5. **Umemoto T, Nakazawa F, Hoshino E, Okada K, Fukunaga M, Namikawa I.** 1997. *Treponema medium* sp. nov., isolated from human subgingival dental plaque. *Int J Syst Bacteriol* **47**:67-72.
6. **Chan Y, Ma AP, Lacap-Bugler DC, Huo YB, Keung Leung W, Leung FC, Watt RM.** 2014. Complete Genome Sequence for *Treponema* sp. OMZ 838 (ATCC 700772, DSM 16789), Isolated from a Necrotizing Ulcerative Gingivitis Lesion. *Genome Announc* **2**:e01333-01314.
7. **Reijntjens FM, Mikx FH, Wolters-Lutgerhorst JM, Maltha JC.** 1986. Adherence of oral treponemes and their effect on morphological damage and detachment of epithelial cells *in vitro*. *Infect Immun* **51**:642-647.
8. **Cheng SL, Siboo R, Quee TC, Johnson JL, Mayberry WR, Chan EC.** 1985. Comparative study of six random oral spirochete isolates. Serological heterogeneity of *Treponema denticola*. *J Periodontal Res* **20**:602-612.

9. **Jacob E, Allen AL, Nauman RK.** 1979. Detection of oral anaerobic spirochetes in dental plaque by the indirect fluorescent-antibody technique. *J Clin Microbiol* **10**:934-936.
10. **Wyss C, Moter A, Choi BK, Dewhirst FE, Xue Y, Schupbach P, Gobel UB, Paster BJ, Guggenheim B.** 2004. *Treponema putidum* sp. nov., a medium-sized proteolytic spirochaete isolated from lesions of human periodontitis and acute necrotizing ulcerative gingivitis. *Int J Syst Evol Microbiol* **54**:1117-1122.
11. **Boehringer H, Taichman NS, Shenker BJ.** 1984. Suppression of fibroblast proliferation by oral spirochetes. *Infect Immun* **45**:155-159.
12. **Miyamoto M, Noji S, Koikeguchi S, Kato K, Kurihara H, Murayama Y, Taniguchi S.** 1991. Molecular cloning and sequence analysis of antigen gene *tdpA* of *Treponema denticola*. *Infect Immun* **59**:1941-1947.
13. **Fenno JC, Wong GW, Hannam PM, Muller KH, Leung WK, McBride BC.** 1997. Conservation of *msp*, the gene encoding the major outer membrane protein of oral *Treponema* spp. *J Bacteriol* **179**:1082-1089.
14. **Mo S, You M, Su YC, Lacap-Bugler DC, Huo YB, Smith GJ, Leung WK, Watt RM.** 2013. Multilocus sequence analysis of *Treponema denticola* strains of diverse origin. *BMC Microbiol* **13**:24.
15. **Weinberg A, Holt SC.** 1990. Interaction of *Treponema denticola* TD-4, GM-1, and MS25 with human gingival fibroblasts. *Infect Immun* **58**:1720-1729.
16. **Hespell RB, Canale-Parola E.** 1971. Amino acid and glucose fermentation by *Treponema denticola*. *Arch Mikrobiol* **78**:234-251.
17. **Mikx FH.** 1991. Comparison of peptidase, glycosidase and esterase activities of oral and non-oral *Treponema* species. *J Gen Microbiol* **137**:63-68.
18. **Salvador SL, Syed SA, Loesche WJ.** 1987. Comparison of three dispersion procedures for quantitative recovery of cultivable species of subgingival spirochetes. *J Clin Microbiol* **25**:2230-2232.

19. **Ohta K, Makinen KK, Loesche WJ.** 1986. Purification and characterization of an enzyme produced by *Treponema denticola* capable of hydrolyzing synthetic trypsin substrates. *Infect Immun* **53**:213-220.
